# Supplementary material for: Synthesis of nitrogen-doped carbon nanoboxes with pore structure derived from zeolite and their excellent performance in capacitive deionization
Source: Royal Society of Chemistry journal article supplement (doi:10.1039/d3ta06096a), 2023-11-28
Supplement: d3ta06096a1.pdf [file d3ta06096a1.pdf]

## Supplementary Information

### **Synthesis of nitrogen-doped carbon nanoboxes with pore structure derived from zeolite and their excellent performance in capacitive deionization**

Keyang Li<sup>a</sup>, Shaoqing Zhu<sup>b</sup>, Shunan Zhao<sup>b</sup>, Ming Gong<sup>a</sup>, Xiaohuan Zhao<sup>a, c, d</sup>, Jie Liang<sup>a, c</sup>, Jianning Gan<sup>a</sup>, Yilun Huang<sup>d, \*</sup>, Ming Zhao<sup>a</sup>, Daming Zhuang<sup>a</sup>, Qianming Gong<sup>a, \*</sup>

<sup>a</sup> Key Laboratory for Advanced Materials Processing Technology, School of Materials Science and Engineering, Tsinghua University, Beijing 100084, PR China

<sup>b</sup> Center for Water and Ecology, State Key Joint Laboratory of Environment Simulation and Pollution Control, School of Environment, Tsinghua University, Beijing 100084, China.

<sup>c</sup> School of Chemistry and Chemical Engineering, Beijing Institute of Technology, Beijing 100081, PR China

<sup>d</sup> SINOPEC Beijing Research Institute of Chemical Industry, Beijing 100013, PR China

\* Corresponding authors. e-mail address:

[gongqianming@mail.tsinghua.edu.cn](mailto:gongqianming@mail.tsinghua.edu.cn) (Q. Gong).

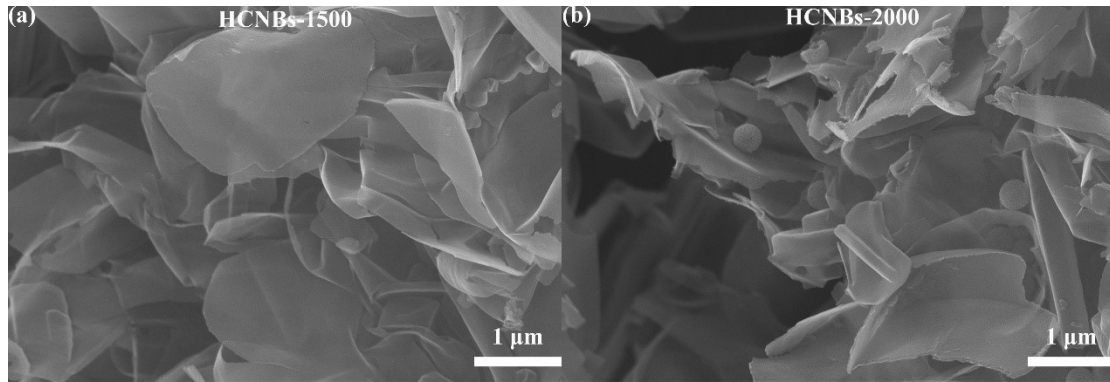

**Figure S1:** Programmed high-temperature treatment of the HCNBs-samples. The numerical postfix of the sample names was added according to the temperature of the final process in the treatment.

**Table S1** The conductivities of densely compacted HCNBs by Hall Effect Measurement System .

| Sample                             | HCNBs-<br>800 | HCNBs-<br>1000 | HCNBs-<br>1200 |
|------------------------------------|---------------|----------------|----------------|
| Conductivity/(S·cm <sup>-1</sup> ) | 3.43±0.12     | 4.72±0.07      | 6.25±0.09      |

**Table S2** Porous structure and nitrogen atomic percentage of the HCNBs samples carbonized at relative high temperature (1500 °C and 2000 °C).

| Sample name | Specific surface area (m <sup>2</sup> /g) | Pore volume (mL/g) | Micropore volume (mL/g) | Atomic percentage of N (%) |
|-------------|-------------------------------------------|--------------------|-------------------------|----------------------------|
| HCNBs-1500  | 107.8                                     | 0.042              | 0.031                   | 1.12                       |
| HCNBs-2000  | 98.2                                      | 0.019              | 0.014                   | 0.76                       |

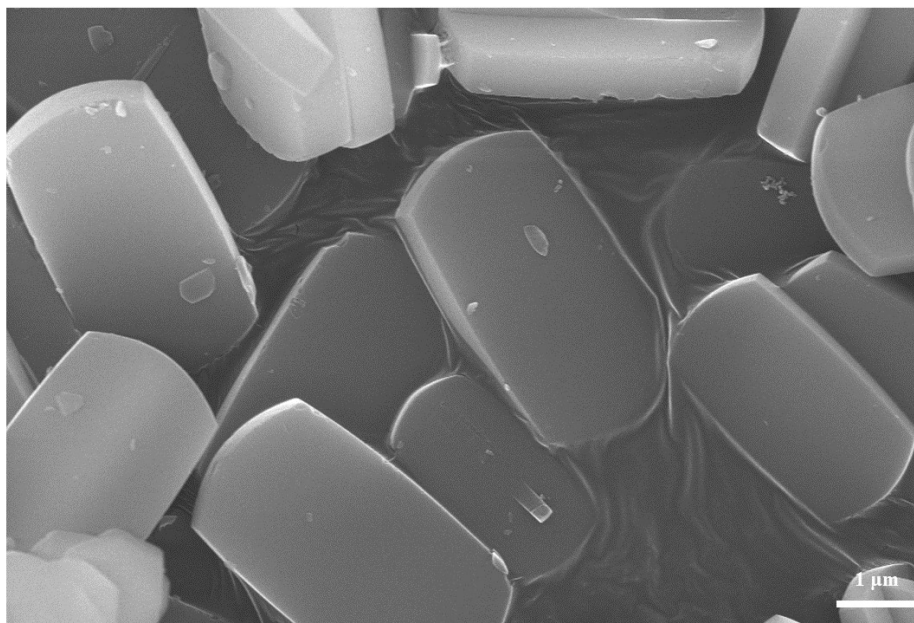

**Fig S2** SEM image of the ZSM-5 particles.

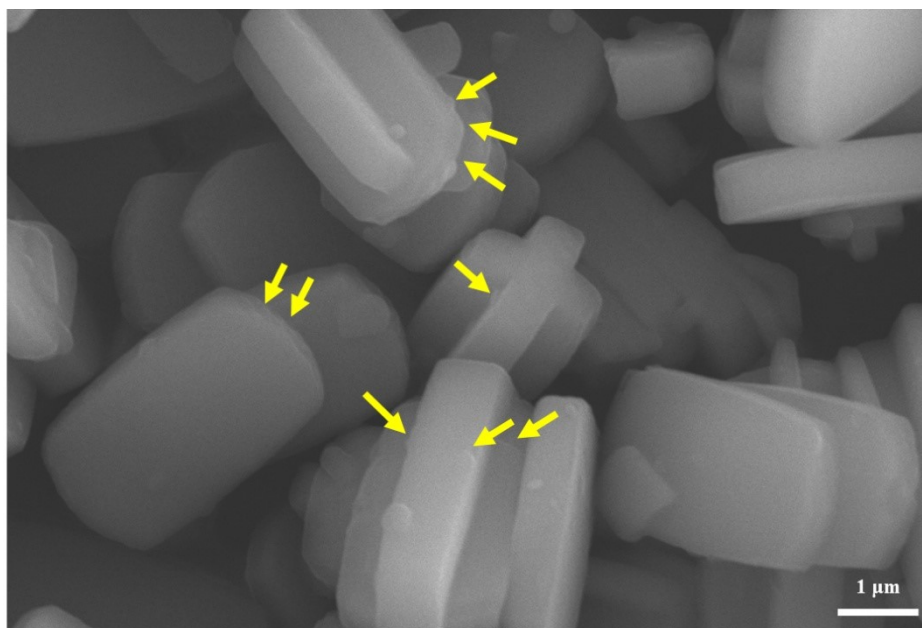

**Fig S3** SEM image of the ZSM-5 particles coated by the in-situ grown 3-aminophenol-formaldehyde resin (ZSM-5@AFP precursor). Yellow arrows are added on the image to point out the obvious polymer layers.

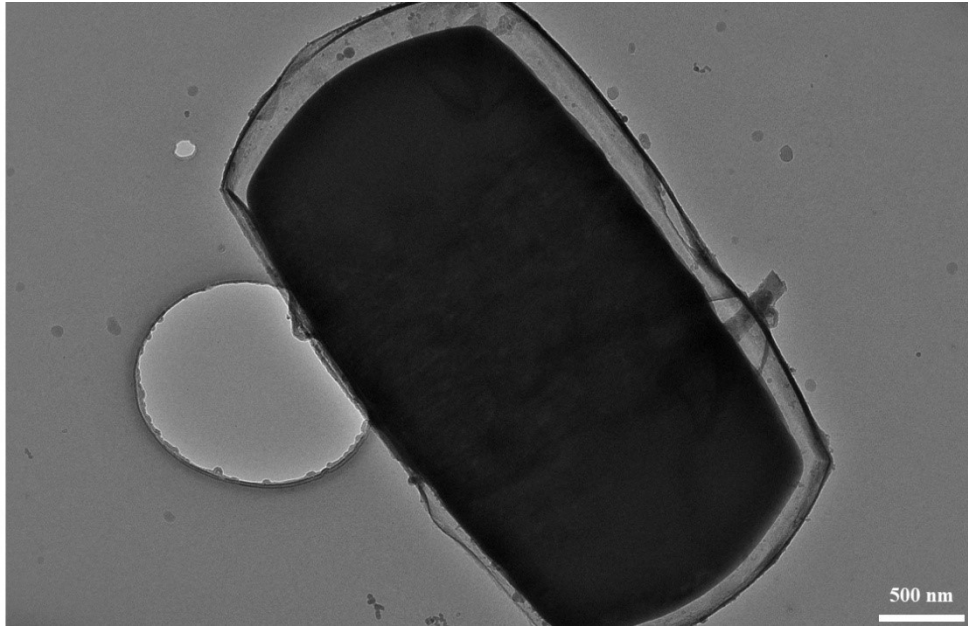

**Fig S4** TEM images of the ZSM-5 particle coated by APF derived carbon (ZSM-5@AFP carbon).

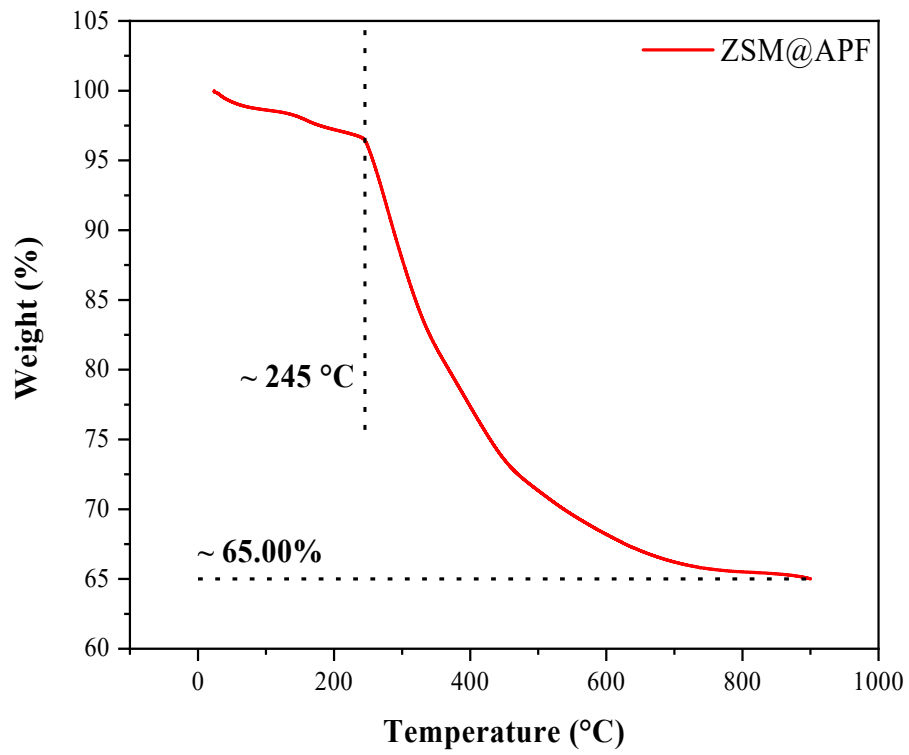

**Fig S5.** TGA analysis of ZSM@APF samples.



**Table S3** Existing forms of the doped nitrogen and oxygen atoms and their atomic percentage according to the XPS N<sub>1s</sub> and O<sub>1s</sub> spectrum.

|                            | HCNBs-800 | HCNBs-1000 | HCNBs-1200 |
|----------------------------|-----------|------------|------------|
| Pyridinic N (%)            | 28.68     | 30.94      | 17.64      |
| Pyrrolic N (%)             | 14.44     | 23.52      | 15.08      |
| Graphitic N (%)            | 39.13     | 28.68      | 30.19      |
| Oxidized N (%)             | 17.75     | 16.86      | 37.26      |
| Atomic percentage of N (%) | 7.11      | 6.29       | 4.92       |
| C=O (%)                    | 18.86     | 23.53      | 30.34      |
| C-O-O/C-OH (%)             | 45.80     | 43.10      | 39.32      |
| COOH (%)                   | 35.34     | 33.37      | 30.36      |
| Atomic percentage of O (%) | 7.43      | 6.39       | 5.61       |

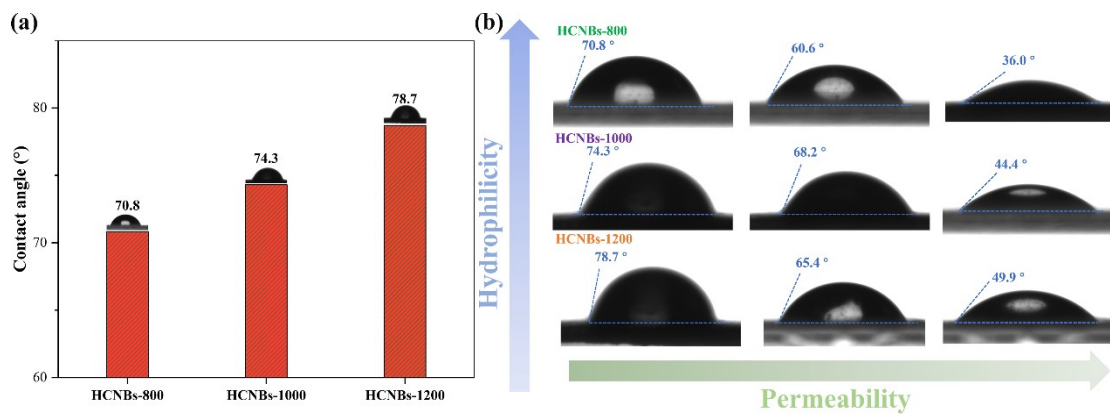

**Fig S6 (a)** Contact angle comparison results of the HCNBs samples. **(b)** Dynamic contact angle measurements of HCNBs

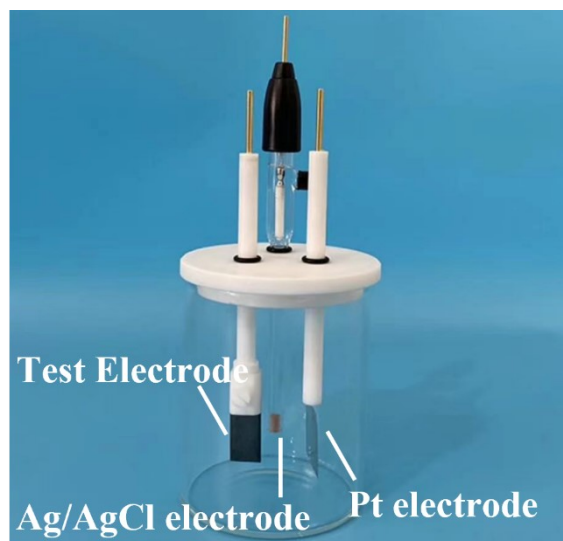

**Fig S7** Image of the three electrodes system applied to investigate the electrochemical performance of the HCNBs-based electrodes.

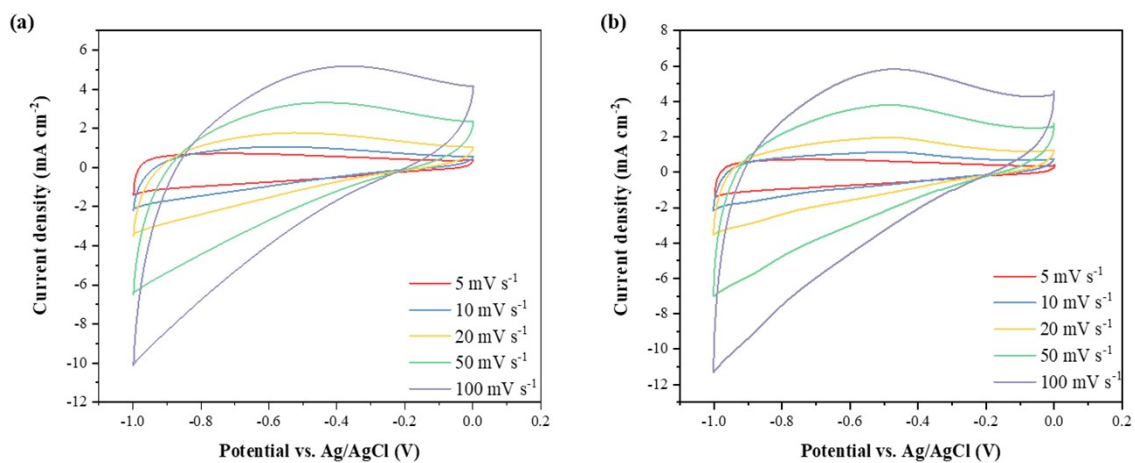

**Fig S8** CV profiles of HCNBs-800 **(a)** and HCNBs-1200 **(b)** electrodes under different scanning rate from 5 mV s<sup>-1</sup> to 100 mV s<sup>-1</sup> in a voltage window from -1.0 V to 0 V

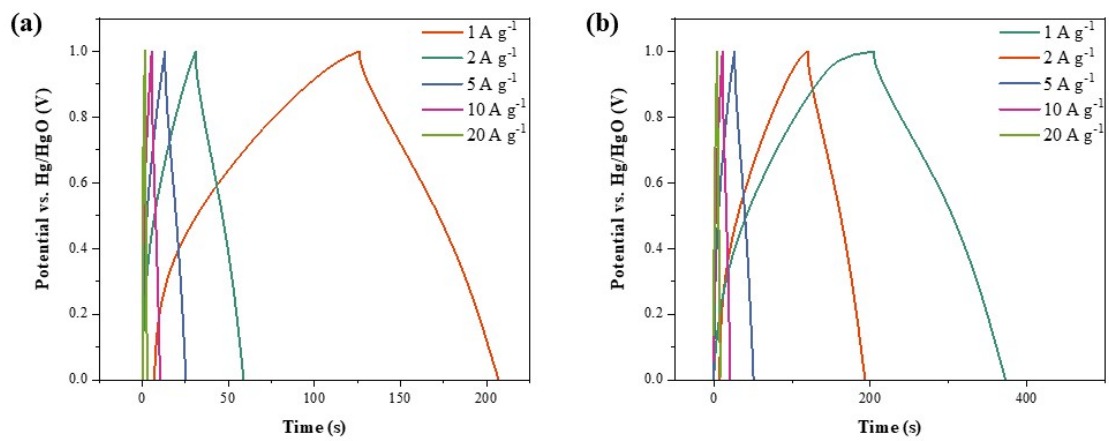

**Fig S9** GCD profiles of HCNBs-800 **(a)** and HCNBs-1200 **(b)** electrodes at different current density from 1 A·g<sup>-1</sup> to 20 A·g<sup>-1</sup>

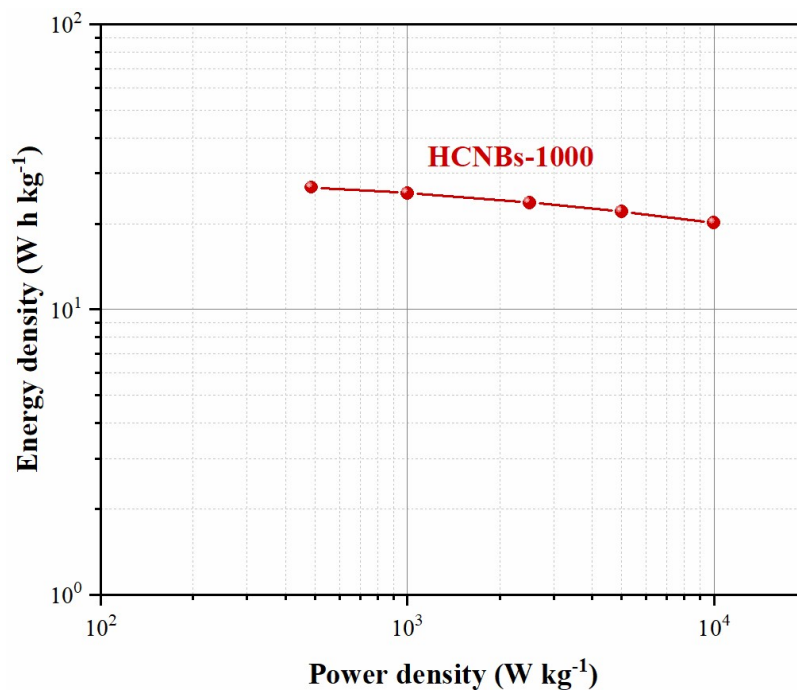

**Fig S10** Ragone plot of the HCNBs-1000-based electrodes.

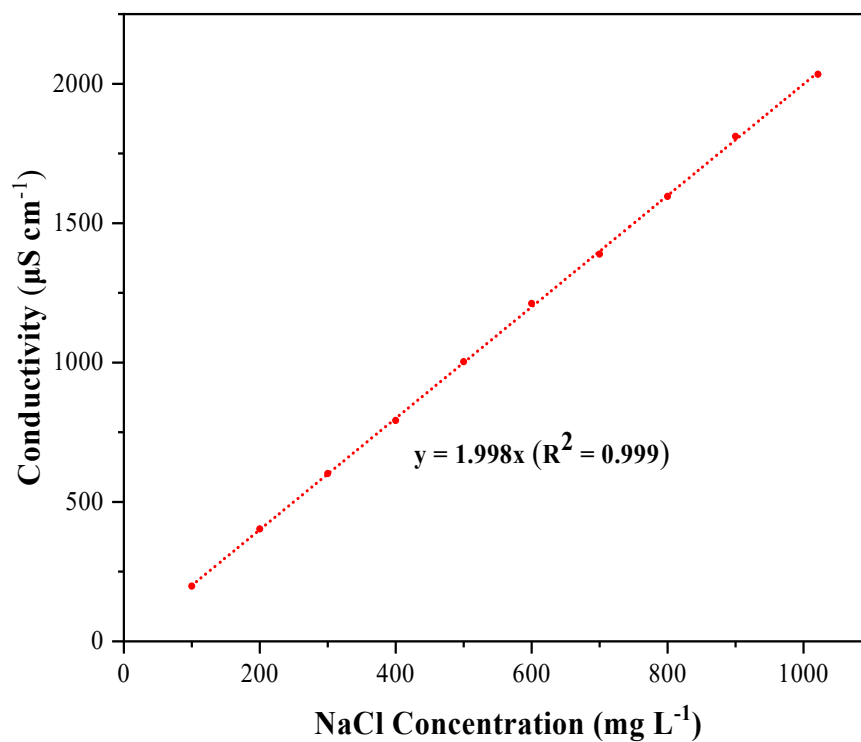

**Figure S11:** Linear correlation between NaCl concentration (mg L<sup>-1</sup>) and solution conductivity (μS cm<sup>-1</sup>)

**Table S4:** Desalination capacities of different carbon and carbon-based materials from the previously reported works under different voltage and NaCl concentration.

| Materials               | NaCl concentration (mg·L <sup>-1</sup> ) | Operation potential (V) | Desalination capacity (mg·g <sup>-1</sup> ) | Ref.             |
|-------------------------|------------------------------------------|-------------------------|---------------------------------------------|------------------|
| GO/CNF webs             | 450                                      | 1.2                     | 13.2                                        | 1                |
| mycelium derived carbon | 500                                      | 1.4                     | 24.17                                       | 2                |
| PPCP800                 | 1000                                     | 1.2                     | 14.62                                       | 3                |
| PCNSs                   | 500                                      | 1.1                     | 15.6                                        | 4                |
| C-Zn                    | 500                                      | 1.5                     | 16.2                                        | 5                |
| Mg-MOFs derived carbon  | 500                                      | 1.2                     | 16.82                                       | 6                |
| PDLCN                   | 500                                      | 1.2                     | 18.8                                        | 7                |
| rGO/PC-10 foamy carbon  | 500                                      | 1.2                     | 25.1                                        | 8                |
| P-CNF                   | 500                                      | 1.2                     | 30.4                                        | 10               |
| NP-EHPC                 | 500                                      | 1.2                     | 24.14                                       | 11               |
| PPD-CNTs@M C            | 600                                      | 1.2                     | 17.5                                        | 12               |
| <b>HCNBs</b>            | <b>500</b>                               | <b>1.4</b>              | <b>32.3</b>                                 | <b>This work</b> |



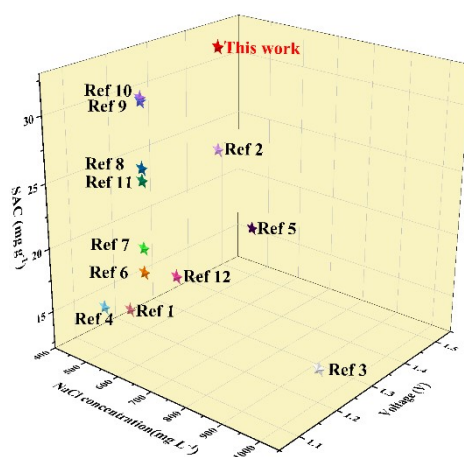

**Fig S12** Comparison of the SAC capacity of this work and previously reported carbon-based materials.

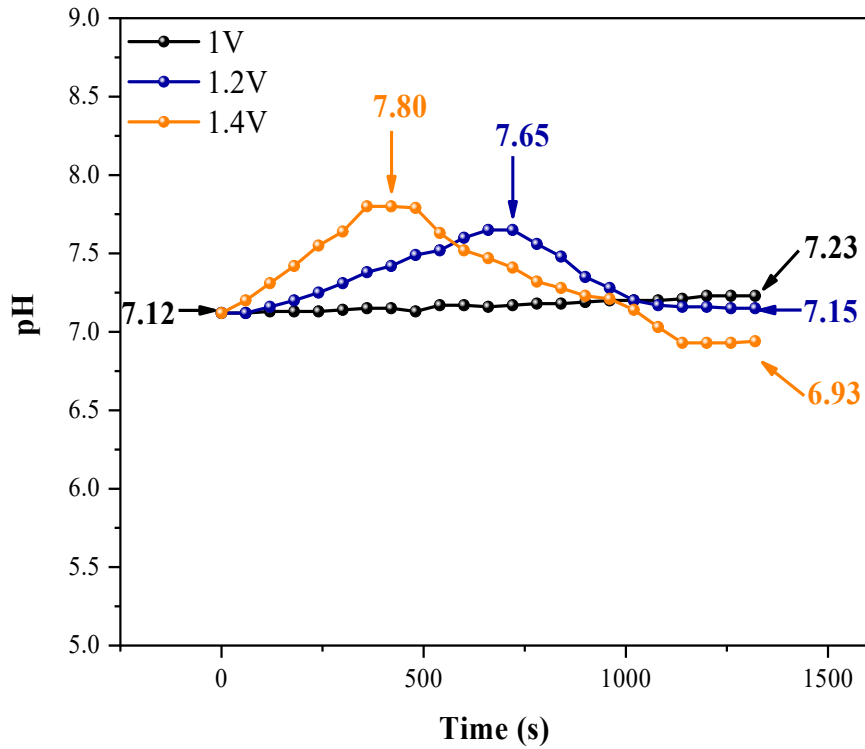

**Fig S13.** Measurement of pH during the desalination process under different voltage (1 V, 1.2 V and 1.4 V, HCNBs-1000-based electrodes, 500 mg·L<sup>-1</sup> NaCl solution)

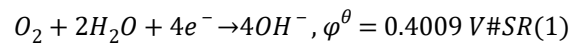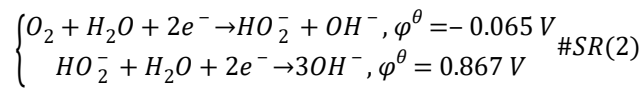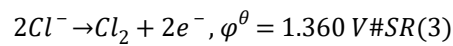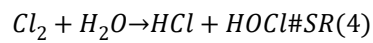

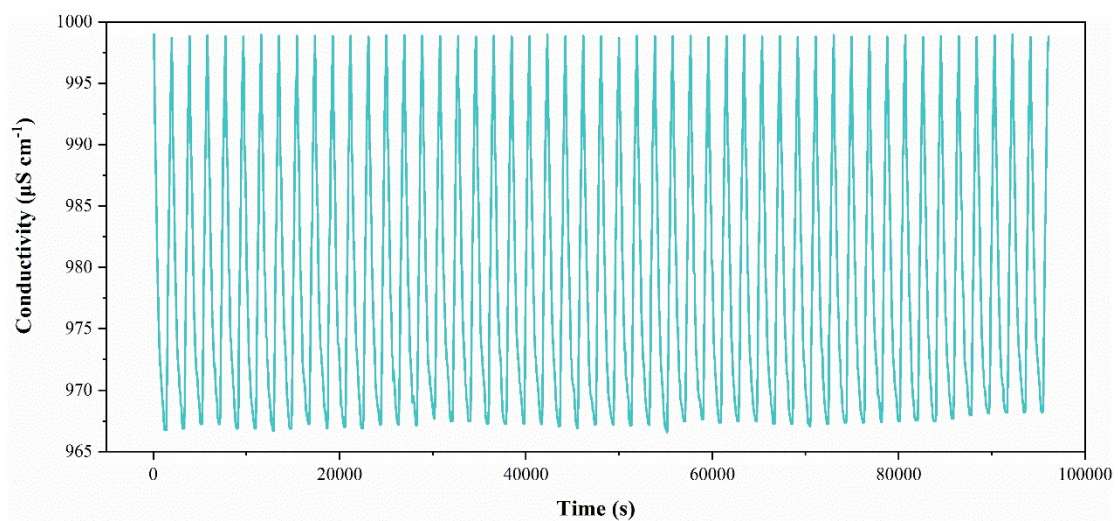

**Fig S14.** The conductivity fluctuation of NaCl solution during 50 cycles of charging/discharging for HCNBs-1000 electrodes ( $500 \text{ mg}\cdot\text{L}^{-1}$ , 1.4 V).

**Table S5.** Charge efficiencies of HCNBs-1000 electrode at different charging voltages with an initial NaCl concentration of 500 mg L<sup>-1</sup>.

| Charging voltage /V | 1     | 1.2   | 1.4   |
|---------------------|-------|-------|-------|
| Charge efficiency   | 0.703 | 0.755 | 0.812 |

**Table S6.** Charge efficiencies of HCNBs-1000 electrode at different initial NaCl concentrations at charging voltage of 1.4 V.

| Initial concentration /mg L <sup>-1</sup> | 125   | 250   | 500   |
|-------------------------------------------|-------|-------|-------|
| Charge efficiency                         | 0.847 | 0.826 | 0.812 |

## Reference:

1. Y. Bai, Z. H. Huang, X. L. Yu and F. Y. Kang, *Colloids and Surfaces a-Physicochemical and Engineering Aspects*, 2014, **444**, 153-158.
2. C. Zhao, Q. Wang, S. Z. Chang, S. Zhang, Z. H. Li, Z. H. Shen, X. Jin, H. Xiao and H. G. Zhang, *Carbon*, 2022, **196**, 699-707.
3. W. L. Xing, M. Zhang, J. Liang, W. W. Tang, P. C. Li, Y. Luo, N. Tang and J. Y. Guo, *Separation and Purification Technology*, 2020, **251**.
4. T. T. Wu, G. Wang, Q. Dong, F. Zhan, X. Zhang, S. F. Li, H. Y. Qiao and J. S. Qiu, *Environmental Science & Technology*, 2017, **51**, 9244-9251.
5. Z. Z. Xie, X. H. Shang, J. B. Yan, T. Hussain, P. F. Nie and J. Y. Liu, *Electrochimica Acta*, 2018, **290**, 666-675.
6. C. P. Li, Y. Q. Wu, F. Y. Zhang, L. X. Gao, D. Q. Zhang and Z. X. An, *Separation and Purification Technology*, 2021, **277**.
7. C. P. Li, Y. Q. Wu, L. X. Gao, D. Q. Zhang and Z. X. An, *Journal of Environmental Chemical Engineering*, 2022, **10**.
8. B. F. Li, Z. H. Xiao, Y. T. Cao, Z. Q. Yu, Y. K. Sun, Z. C. Li, Y. X. Wang, Z. F. Gao and C. M. Xu, *Fuel*, 2023, **352**.
9. C. P. Li, Y. Q. Wu, J. J. An, L. X. Gao, D. Q. Zhang, J. Li and Z. X. An, *Desalination*, 2023, **559**.
10. P. F. Nie, S. P. Wang, X. H. Shang, B. Hu, M. H. Huang, J. M. Yang and J. Y. Liu, *Desalination*, 2021, **520**.
11. H. Zhang, C. H. Wang, W. X. Zhang, M. Zhang, J. W. Qi, J. S. Qian, X. Y. Sun, B. Yulianto, J. Na, T. Park, H. G. A. Gomaa, Y. V. Kaneti, J. W. Yi, Y. Yamauchi and J. S. Li, *Journal of Materials Chemistry A*, 2021, **9**, 12807-12817.
12. Y. Lian, D. W. Wang, H. X. Guo, Z. L. Cao, J. Zhao and H. H. Zhang, *Carbon*, 2023, **204**, 50-56.
